1 **The interoceptive hippocampus: mouse brain**  
2 **endocrine receptor expression highlights a dentate**  
3 **gyrus (DG)–cornu ammonis (CA) challenge–**  
4 **sufficiency axis**

5  
6 **Richard Lathe<sup>1,\*</sup>, Sheena Singadia<sup>2</sup>, Crispin Jordan<sup>3</sup>, and Gernot**  
7 **Riedel<sup>2,\*</sup>**

8  
9 <sup>1</sup>Division of Infection Medicine, University of Edinburgh Medical School, Little France,  
10 Edinburgh EH16 4SB, UK

11 <sup>2</sup>Division of Behavioral Neuroscience, Institute of Medical Sciences, University of  
12 Aberdeen, Foresterhill, Aberdeen AB25 2ZD, UK

13 <sup>3</sup>Division of Biomedical Sciences, University of Edinburgh Medical School, George  
14 Square, Edinburgh EH8 9XD, UK

15  
16 \*Correspondence: richard.lathe@ed.ac.uk; g.riedel@abdn.ac.uk.

17 Orcid (R.L.): 0000-0001-9698-9834

18  
19 Short title: The interoceptive hippocampus

20  
21 **Abstract**

22 The primeval function of the mammalian hippocampus (HPC) remains uncertain.  
23 Implicated in learning and memory, spatial navigation, and neuropsychological  
24 disorders, evolutionary theory suggests that the HPC evolved from a primeval  
25 chemosensory epithelium. Internal sensing deficits in patients with HPC lesions  
26 argue that internal sensing may be conserved in higher vertebrates. We studied the  
27 expression of 250 endocrine receptors in mouse brain. Key findings are (i) the  
28 proportions and levels of endocrine receptor expression in the HPC are significantly  
29 higher than in all other comparable brain regions. (ii) Surprisingly, the distribution of  
30 endocrine receptor expression within mouse HPC was found to be highly structured:

31 receptors signaling 'challenge' are segregated in dentate gyrus (DG), whereas those  
32 signaling 'sufficiency' are principally found in *cornu ammonis* (CA) regions. Selective  
33 expression of endocrine receptors in the HPC argues that internal sensing remains a  
34 core feature of hippocampal function. Further, we report that ligands of DG receptors  
35 predominantly inhibit both synaptic potentiation and neurogenesis, whereas CA  
36 receptor ligands conversely promote both synaptic potentiation and neurogenesis.  
37 These findings suggest that the hippocampus acts as an integrator of body status,  
38 extending its role in context-dependent memory encoding from 'where' and 'when' to  
39 'how I feel'. Implications for anxiety and depression are discussed.

40

## 41 **Introduction**

42 Current thinking predominantly attributes to the hippocampus (HPC) a pivotal role in  
43 learning and memory, in spatial navigation, and in anxiety, stress, and depression.  
44 However, the central function of the HPC in both memory and neuropsychological  
45 disorders may be consistent with an underlying role in internal sensing (interoception).  
46 Previous studies have implicated cortical regions, limbic brain, and thalamus, as well  
47 as the hypothalamus and brainstem regions, among others, in interoception [1]. The  
48 HPC (and adjoining amygdala) is a prominent contender – in addition to his profound  
49 learning and memory deficits following HPC surgery to alleviate severe recurrent  
50 epilepsy [2], the famous patient H.M. was unable to sense internal states [3]. Similar  
51 observations have been made in rodents with selective HPC lesions [4-6].

52 A role for the HPC in internal sensing is consistent with evolutionary theory  
53 that the HPC (and olfactory system) arose from a chemosensory epithelium, but with  
54 the closing of the brain ventricles during evolution the hippocampus retained the  
55 capacity to sense the internal milieu of the body [7-9]. It is of note that the 'rostral  
56 migratory stream' in neonatal mice directly connects the HPC and the chemosensing  
57 olfactory system [10], consistent with a common developmental origin. In addition, a  
58 key characteristic of traditional sensory epithelia such as the olfactory system and  
59 retina in many vertebrate species is that neurogenesis continues into adulthood  
60 [11,12], and neurogenesis is also prominent in adult hippocampus, principally  
61 underlying the dentate gyrus (DG) (reviewed in [13]).

62 Internal sensing is a key modulator of behavior. Hunger and thirst are induced  
63 by deficiencies in nutrient and water, respectively, and elicit clear adaptive  
64 motivations and behaviors. Other diverse internal states, ranging from salt deficiency

65 to hormonal status to inflammation/infection, exert powerful effects on multiple  
66 aspects of brain function, centrally including adaptive behavior as well as learning  
67 and memory, but the target brain region(s) and receptors remain poorly defined.

68 The anatomy of the mammalian HPC is consistent with an internal sensory  
69 role. The hippocampal formation lies at the interface (*limbus*, 'fringe') between the  
70 lower brain and the mass of the cerebral cortex. In terms of blood supply, the HPC is  
71 perhaps the most highly irrigated of all brain regions, and is also flanked by the  
72 central and lateral ventricles with the choroid plexus [14]. In cross-section, the  
73 formation is divided into CA regions CA1 and CA3 (with a short intervening structure,  
74 CA2), and the DG. There may be a further functionally distinct region, the dentate  
75 hilus, but this is less secure. Gene expression surveys largely confirm this anatomy  
76 [15,16]. Some have introduced additional subdivisions both within the DG–CA circuit  
77 [17] and along the length of the hippocampus [18]. However, for simplicity we retain  
78 the conventional subdivisions CA1–CA3 and DG.

79 To address the physiological role of the HPC we previously employed  
80 differential hybridization [19], candidate gene screening [20], and gene-trapping [21]  
81 to identify genes selectively expressed in HPC. This revealed that the mouse HPC  
82 expresses several receptors and signaling molecules, potentially indicating a role of  
83 the HPC in internal sensing of body physiology [9]. The aim of the present study was  
84 therefore to test rigorously the hypothesis that the hippocampus is involved in  
85 interoception through systematic analysis of the expression patterns of endocrine  
86 receptors across mouse brain, including subregions of the HPC.

87 Specifically, we sought to answer two central questions. (i) Does the mouse  
88 HPC express a greater diversity and/or level of endocrine receptors than other brain  
89 regions such as the cortex and the cerebellum? (ii) If a greater level of expression is  
90 found, are these receptors expressed uniformly across the HPC, or are different  
91 receptors differently distributed in the different subdivisions of the HPC? – and can  
92 the pattern of expression tell us anything about the function of the HPC? We report  
93 that the HPC is the principal brain site of endocrine receptor expression and, perhaps  
94 surprisingly, this analysis revealed a highly segregated distribution of receptor  
95 expression in mouse hippocampus.

96  
97  
98

## 99 **METHODS**

### 100 **Endocrine receptors**

101 A list was assembled of receptor molecules in mice and humans that respond to  
102 endocrine (blood-borne) ligands. We elected to study 250 receptors, a number  
103 chosen to minimize the risk that a small number of atypical receptors or experimental  
104 artifacts might bias the overall picture, weighed against the labor-intensive  
105 constraints of manually analyzing a larger number of receptors. To assemble the list,  
106 the GeneCards database ([www.genecards.org](http://www.genecards.org)) was searched at random for  
107 genes/gene products containing 'receptor'. A preliminary list (>>250 receptor  
108 candidates) was manually filtered to exclude (i) non-receptor entries (e.g., receptor  
109 downstream kinase, etc.), (ii) evident receptors for neurotransmitter and non-  
110 diffusible cell–cell interaction molecules, and (iii) receptors not listed in the primary  
111 database consulted (Allan Brain Atlas) as well as receptors whose expression profiles  
112 were classified as failing quality control. Although principally cell-surface molecules,  
113 the final list includes intracellular receptors with an endocrine role (e.g., nuclear  
114 receptors). This generated a list of 253 endocrine receptors (Table S1 in the  
115 supplementary material online; the molecular functions of specific groups of receptors  
116 are discussed in Box S1).

117

### 118 **Quantification of mouse brain endocrine receptor expression data**

119 Primary analysis relied on the Allen Brain Atlas (ABA; <http://mouse.brain-map.org/>), a  
120 publicly available repository of *in situ* hybridization gene expression data across  
121 mouse brain [22] made available by the Allen Institute for Brain Science established  
122 by Paul G. Allen. To retrieve expression patterns we entered search terms (e.g.,  
123 Gene1) into <http://mouse.brain-map.org/search/show>, sagittal sections were selected  
124 in all cases when these were available. The 'expression' option and the target brain  
125 region (typically mid-brain including the hippocampus) were selected, a screenshot  
126 was taken; data for all 253 receptors were recorded at the same magnification and  
127 intensity in a repository of image files. To quantitate expression levels ImageJ [23,24]  
128 was employed. Using default settings, and a standard image size, representative  
129 brain regions (HPC; cortex, CX; and cerebellum, CB) were selected using a cursor  
130 box of constant size and analyzed using the 'measure' function of ImageJ (the  
131 olfactory bulb could not be systematically analyzed because this structure can be lost  
132 during dissection, and the small relative size of the mouse hypothalamus precludes

133 analysis at the resolution afforded by ABA). In each case the 'Mean' function was  
134 used instead of the integrated density function 'IntDen' because, at constant image  
135 size, the relative values are the same. The same technique was used for  
136 hippocampal subregions, but the cursor box was manually fitted to the separate  
137 regions (CA1, CA2, CA3, DG). The 'Mean' function in these cases represents relative  
138 (total) expression of the target gene within the region measured. These analyses  
139 generate a digital intensity reading on a scale of 0 to 255. The program  
140 accommodates different colors as follows: black, 0.00; red, 85/255 (0.333); yellow,  
141 170/255 (0.666); white, 255/255 (1.000), mirroring the output of the ABA. Because  
142 region selection is to some extent subjective, subregion expression analysis was  
143 performed by two independent researchers; in cases of disparity consensus was  
144 reached following reanalysis of the primary data. Values were then normalized – a  
145 biologically realistic data transformation because (i) the signal for each target  
146 depends on the hybridization properties of the specific probe employed, (ii) the  
147 biological effects of a given receptor will vary across a wide range depending on  
148 ligand concentration, ligand affinity, and downstream signal transduction, and (iii) for  
149 a given gene, the inter-regional pattern (ratio) of expression across the  
150 brain/hippocampus (unlike absolute values) is likely to be independent of the specific  
151 probe/hybridization parameters. For normalization, the highest expression value was  
152 selected (100%) and expression in other regions was expressed as a percentage of  
153 maximum. Inter-region expression ratios in whole brain were calculated from the un-  
154 normalized expression data. Primary data for receptor gene expression across the  
155 brain are given in supplementary Table S2, and for hippocampal subregions in  
156 supplementary Table S3.

157

### 158 **Heat mapping and statistical analysis**

159 All analyses focused on genes that were expressed in at least one of the selected  
160 brain regions (98 genes in Figure 1, and 86 genes in Figure 2), and were conducted  
161 in the R programming environment, version 3.3.3 [25]. Heatmaps were generated  
162 using heatmap.2 in the gplots library for R. Note that heatmap.2 provides  
163 dendrograms to aid visualization of relationships among components of the heatmap  
164 but provides no statistics to indicate support for the presented dendrograms versus  
165 alternative, competing dendrograms. Therefore, we strongly caution against  
166 overinterpretation of the dendrograms presented.

167 To test whether gene expression profiles differ across brain regions (HPC, CX,  
168 and CB) we measured the correlation in gene expression among brain regions. To  
169 this end, we analyzed normalized gene expression (see above) because variation in  
170 probe affinity may generate spurious correlations. We calculated the correlation using  
171 arcsine square root transformed values of normalized gene expression, and used  
172 case-bootstrapping to generate 95% confidence intervals (R package 'boot' [26,27];  
173 bootstrapped 10 000 replicates).

174 Wilcoxon signed rank tests and paired *t* tests were used to determine whether  
175 non-normalized gene expression differed among brain regions (Wilcoxon tests to  
176 compare HPC, CX and CB; paired *t* tests to compare CA1, CA2, CA3, and DG). We  
177 used Chi-square goodness of fit tests to determine whether genes that are  
178 exclusively (or alternatively, predominantly) expressed in HPC, CB, or CX are  
179 distributed equally among these regions. We used a series of three binomial tests to  
180 determine whether the numbers of genes expressed differed among HPC, CB and  
181 CX. Pairwise correlation analysis is given in Table S4.

182

### 183 **Informative genes**

184 For the majority of receptor genes the biological function of the receptor and/or the  
185 identity of the ligand(s) remains unknown. For further analysis we therefore selected  
186 an 'informative' subset of 32 genes where information is available concerning the  
187 biological role (or inferred role) of the ligand/receptor pair. This subset included  
188 receptors for known diffusible hormones (e.g., estrogen, glucocorticoids,  
189 progesterone), for cytokines (e.g., interleukins, interferons, tumor necrosis factor),  
190 and growth factors (e.g., fibroblast growth factor). The list of informative genes is  
191 presented in Table S5.

192

### 193 **Inter-region expression ratios in hippocampus; statistical analysis**

194 Normalized expression data were used to test whether gene expression ratios  
195 among hippocampus regions differed between group A versus B genes (for an  
196 explanation of groups A and B see Results and Discussion). The mean expression  
197 data for CA (CA1–3) and DG were calculated and then log-transformed (1 or 2 was  
198 added to all values prior to log-transformation to account for zeros; the outcome was  
199 the same in both cases). Pairwise DG/CA expression ratios ( $\Delta$ ) were calculated from  
200  $\Delta = \log(\text{DG}) - \log(\text{CA})$  {therefore,  $\Delta = \log(\text{DG}/\text{CA})$ }. Welch's *t* test was employed to

201 assess statistical significance of pairwise differences in ratios (i.e.,  $\Delta$ ) for informative  
202 (group A, challenge; and group B, sufficiency) genes. The same approach was  
203 employed for HippoSeq data (below).

204 However, because the distribution of  $\Delta$  violates the assumptions of  $t$ -tests, we  
205 additionally used a permutation test to confirm conclusions from the  $t$ -test. The  
206 permutation test has two stages. First, average  $\Delta$  was calculated for each group of A  
207 and B genes, and the difference between these averages was calculated. This value  
208 represents the observed difference in average  $\Delta$  between groups A and B. Second,  
209 (i)  $\Delta$  values were randomized among groups A and B, (ii) average  $\Delta$  of these  
210 randomized data was calculated for group A and B genes, and (iii) the difference  
211 between these average  $\Delta$  values between groups A and B was calculated. We  
212 repeated this second stage 10 000 times to generate a null distribution, against which  
213 we compared the observed difference in average  $\Delta$  between group A and B genes to  
214 yield the  $P$  value reported here.

215 We used Dunn–Sidak corrected critical  $P$  values to assess significance when  
216 making multiple comparisons ( $P_{\text{crit}} = 0.0169$  and  $0.00851$  for three and six  
217 comparisons, respectively).

218

### 219 **Cross-validation of expression data**

220 To validate data from the Allan Brain Atlas we consulted HippoSeq  
221 (<https://hipposeq.janelia.org>) [28], a database of gene expression data. HippoSeq is  
222 based on transgenic tagging of subregions of mouse HPC, brain microdissection,  
223 fluorescence cell-sorting retrieval of target HPC CA pyramidal cell/dentate neuronal  
224 populations, and deep sequencing of mRNA populations. A revised input format (kind  
225 courtesy of Cembrowski *et al.*) allowed query of multiple genes, generating a table of  
226 absolute readcounts (FPKM, fragments per kb of transcript per million mapped reads).  
227 Cross-comparison to ABA established a lower limit (null expression) where 4 FKPM  
228 equated to an undetectable hybridization signal (not presented). Parallels and  
229 differences between the ABA and HippoSeq studies are summarized in Table S6.

230 Because ABA is more robust than HippoSeq in terms of the number of animals  
231 studied (a small number of unrepresentative animals would be less likely to affect  
232 conclusions based on ABA rather than on HippoSeq, Table S6), and because an *in*  
233 *situ* hybridization pattern (ABA, particularly if confirmed by identical patterns  
234 generated in other mouse strains or species) may be more immune to bias than an

235 automatically generated value (HippoSeq), ABA was preferred over HippoSeq for our  
236 primary analysis, although both are reported where appropriate.

237

### 238 **Analysis of receptor function**

239 PubMed was searched for the name of each individual receptor in conjunction with  
240 'synaptic potentiation' OR 'synaptic plasticity' OR 'long-term potentiation' OR 'LTP'  
241 OR 'neurogenesis'. Relevant publications were manually tabulated for ligand effects  
242 on both parameters and are listed in Table S8. Intergroup pairwise comparisons of  
243 effects (inhibition versus stimulation) of literature-recorded ligands on LTP and  
244 neurogenesis employed both Student's unpaired *t* test and chi-square test.

245

## 246 **RESULTS**

247 A representative list of 253 endocrine receptors was compiled (neurotransmitter  
248 receptors and cell–cell interaction molecules were excluded; supplementary Table  
249 S1). *In situ* hybridization patterns were extracted from the Allen Mouse Brain Atlas  
250 (ABA); these were manually scanned and quantified (Methods). Where appropriate,  
251 values were normalized and inter-region ratios calculated.

252

### 253 **Brain distribution of endocrine receptor expression**

254 We report that, of all endocrine receptors, 98/253 (38.7%) were detectably expressed  
255 in brain. This argues that, in addition to regulating body physiology including growth,  
256 development, reproduction, and homeostasis, etc., a major proportion of endocrine  
257 receptors may directly regulate brain function and cognition.

258 We also report that endocrine receptor expression in mouse brain is limited to  
259 specific brain regions. Only a small number of genes were expressed in major areas  
260 such as the olfactory bulb (OLF), thalamus, pons/medulla, pallidum, or striatum  
261 (4.3%; see below). This focused our attention on HPC, cortex (CX), and cerebellum  
262 (CB). Hypothalamus could not be examined (Methods and Discussion).

263 Regarding our first question – the proportion of endocrine receptors expressed  
264 in mouse HPC – we report that 86 of 253 (34.0%) endocrine receptors are expressed  
265 in HPC, a higher number than in either CB (53) or CX (76). Importantly, the level of  
266 expression in was highest in HPC. Of all receptors with detectable expression in  
267 brain ( $n = 98$ ), 61.3% were most prominently expressed in the principal neuronal  
268 layers (pyramidal and granule cells) of the HPC (versus 9.1% in CB and 25.5% in



269 CX). Indeed, 17.3% of brain-expressed endocrine receptors were exclusively  
270 expressed in HPC (compared to 4.1% and 7.1% that were exclusively expressed in  
271 CB and CX, respectively). Fig. 1 presents heatmaps of the normalized and un-  
272 normalized expression data for these three brain regions, and the inset gives  
273 numerical values for exclusivity, most prominent, and detectable expression.

274 Non-normalized gene expression differed significantly in all pairwise  
275 comparisons among HPC, CB, and CX. The HPC expressed these genes at  
276 significantly higher levels than either CX or CB (Wilcoxon signed rank test; vs CX:  $V$   
277 = 3467,  $P = 3.266e-06$ ; vs CB:  $V = 3527$ ,  $P = 1.398e-08$ ), and CX expressed genes  
278 at higher levels than CB ( $V = 2208.5$ ,  $P = 0.009944$ ). All comparisons remained  
279 significant after accounting for multiple comparisons. Overall, the probability of  
280 detectable gene expression was significantly higher for HPC than CB (binomial test,  
281  $P = 0.0101$ ), but did not differ for remaining comparisons (binomial tests; HPC and  
282 CX:  $P = 0.58$ ; CX and CB:  $P = 0.052$ ); these results remain unchanged after  
283 accounting for multiple comparisons.

284 Although we were unable to systematically screen for expression in OLF  
285 (Methods), a very small number of genes from our selection were expressed in OLF  
286 (*Ednrb*, *Epor*, *Ccr3*, *Crhr1*, *Nrp1*, and *Nmbr*) of which only *Ccr3* and *Nmbr* appeared  
287 to be specific for OLF. Remaining genes were expressed in striatum and/or pallidum  
288 (*Acvr11*, *Nfgr*, *Rarb*) or in pons/medulla (*Adipor2*, *Esrrg*). No other brain regions stood  
289 out with other than trace expression in this survey (small foci of low-level expression,  
290 not presented); in total, these represent 4.3% of all the endocrine receptors studied,  
291 a far lower proportion than in either HPC, CB, or CX.

292 We conclude that, based on 253 receptors, there is significantly greater  
293 endocrine receptor gene expression in HPC than in either CB or CX, or in any other  
294 comparable brain region analyzed (noting that hypothalamus could not be studied;  
295 Discussion).

296

### 297 **Distribution across hippocampal subregions**

298 With regard to our second question – the pattern of expression within the HPC – all  
299 the receptors studied with detectable HPC expression ( $n = 86$ ; Fig. 1) identified  
300 mRNA within the cell bodies of the principal excitatory neurons (pyramidal cells, DG  
301 neurons) of the HPC. However, the expression patterns of the assembled genes  
302 were non-randomly distributed across subregions – although some were detectably

303 expressed in all subregions, many were expressed only in restricted regions of the  
304 HPC. Fig. 2 presents the distribution (heatmap) of receptor expression across the  
305 different regions of the mouse HPC. To address correlations between HPC  
306 subregions, we performed pairwise correlation analysis (Table S4). Normalized gene  
307 expression was significantly negatively correlated between DG and CA1, and  
308 positively correlated between CA2 and CA3. All remaining combinations of CA1, CA2,  
309 CA3, and DG provided no evidence of correlated gene expression (Table S4).

310 To validate the subregional distributions in mouse HPC, we compared ABA *in*  
311 *situ* hybridization data against a second database, HippoSeq (Methods; this database  
312 only addresses HPC expression). The HippoSeq database supported the overall  
313 subregional expression patterns detected by *in situ* hybridization.

314

### 315 **Distribution of receptors with established roles: subregion–function** 316 **correlations reveal a challenge–sufficiency axis**

317 For the majority of the receptors studied here the biological 'meaning' is unknown,  
318 either because the receptor ligand is unknown or because the physiological role of  
319 the ligand(s) has not been established. To illustrate, the first and last genes in our list,  
320 *Acvr1* and *Vmnr234*, respectively encode activin A receptor type 1 and a  
321 vomeronasal-like receptor. Ligands for ACVR1 include both inhibins and activins, that  
322 inhibit and activate diverse physiological processes and, moreover, have opposing  
323 functions; the primary *in vivo* ligand for ACVR1 in the CNS remains unknown. For  
324 VMNR234, the ligand is also unknown. Given this uncertainty we examined receptors  
325 from an 'informative' list ( $n = 32$ ) where the function of the ligand is known (or  
326 inferred): these include angiotensins, cytokines, fibroblast growth factor (FGF),  
327 interleukins/interferons, prostaglandins, retinoids, steroid hormones (androgens,  
328 estrogens, glucocorticoids and mineralocorticoids), tumor growth factor (TGF), and  
329 tumor necrosis factor (TNF) (Methods and Table 3). This revealed a gradient of  
330 expression across the HPC, where some receptors were principally expressed in DG  
331 regions, and others were principally expressed in CA regions (Fig. 3).

332 **Receptor categorization by function.** We sought a unifying principle that  
333 might underpin and explain the gradient of receptor expression. It became apparent  
334 that receptor function differed according to location within the HPC. Receptors  
335 reflecting stress of various types (e.g., receptors for inflammatory cytokines and  
336 glucocorticoids) provided a clue because their expression was clustered in DG.

337 Conversely, it was noted that receptors responding to growth-promoting ligands (e.g.,  
338 growth factors and sex steroids) were principally localized in CA regions. On this  
339 basis it was possible to classify each ligand/receptor pair into two groups.

340 Because one group of receptor ligands (designated 'group A') signal loss of  
341 homeostasis and/or physiological stress of various types (these ligands include  
342 angiotensins – blood pressure fall; glucocorticoids – stress hormones; cytokines,  
343 interferons, and TNF – immune challenge), we describe these here as denoting  
344 'challenge', whereas a second group of ligands ('group B') conversely includes  
345 growth-promoting hormones and factors (e.g., androgens, estrogens, fibroblast  
346 growth factor, retinoids), which we term here 'sufficiency' (more detailed listing and  
347 discussion of receptor function is presented in Table S8 and Box S1). Although this  
348 classification is fully open to debate and refinement, we believe that it provides a  
349 potential interpretation of the observed gradient of expression.

350 As shown in Fig. 3, there was unexpected clustering of group A ('challenge')  
351 receptor expression in DG, whereas group B ('sufficiency') receptors were  
352 predominantly expressed in CA regions.

353 To address the statistical significance of the patterning of group A versus group  
354 B observation we calculated the ratios between different hippocampal subregions  
355 (mean of CA regions versus DG) by conversion to  $\log_{10}$  values and subtraction  
356 (Methods) and plotted the results for the two groups A and B (Fig. 4). The ratio of  
357 gene expression in CA to DG differed significantly between group A and B genes  
358 (Welch's *t*-test,  $t = 4.22$ ,  $df = 27.69$ ,  $P = 0.00024$ ). The same analysis was then  
359 repeated for the HippoSeq data; this also achieved significance for CA regions  
360 versus DG ( $P = 0.0016$ ). Permutation tests confirmed these findings.

361 We conclude that the expression pattern is highly structured within mouse  
362 HPC, and that group A receptors ('challenge') are preferentially expressed in DG, and  
363 group B receptors ('sufficiency') are selectively expressed in CA regions (Fig. 3).

364

### 365 **Further receptors confirm the generality of the axis**

366 To test whether the axis extends to other endocrine receptors, we examined the  
367 expression pattern (in both ABA and HippoSeq) of other informative receptors (that  
368 were not on our original list) whose ligand is known and that are expressed in brain.  
369 We identified five such receptors. All were expressed in mouse HPC (although  
370 interleukin 6 receptor was only expressed at low levels, Table S7). Challenge

371 receptors (interleukin 6 receptor, growth hormone secretagogue receptor, opioid  
372 growth factor receptor, and irisin receptor) were all expressed at higher levels in DG  
373 than in CA regions, whereas sufficiency receptors were expressed at highest level in  
374 CA regions (glucagon-like peptide 1 receptor) or were expressed at similar levels in  
375 CA and DG (leptin receptor) (Table S7), confirming (5/5) that the DG versus CA  
376 differential ratio extends to other receptors, reinforcing the generality of our findings.

377

### 378 **HPC receptors are functional: synaptic potentiation and neurogenesis**

379 We addressed whether the informative receptors are functional *in vivo* and *in vitro* by  
380 literature searching regarding two output measures: synaptic potentiation (long-term  
381 potentiation, LTP) and neurogenesis. The evidence argues that these endocrine  
382 receptors are fully functional and modulate both LTP and neurogenesis.

383 **Synaptic potentiation.** Although not all receptors have been studied in the  
384 literature, there was evidence that DG ligands predominantly inhibit LTP, whereas CA  
385 ligands promote LTP. For example, DG ligands IL-1, IL-2, IFN- $\alpha$ , IFN- $\gamma$ , TGF- $\beta$ , and  
386 TNF- $\alpha$  all inhibit LTP in rodent hippocampus [29-36]. By contrast, CA1 ligands such  
387 as cholecystokinin (CCK), different types of FGF, and somatostatin (SST) are  
388 reported to enhance hippocampal LTP [37-40]. Thyroid hormone deficiency is  
389 associated with pronounced deficits in synaptic plasticity (e.g., [41-43]). Caution is  
390 urged, however, because some ligands may have distinct (even converse) effects on  
391 CA1 versus DG LTP, perhaps pointing to functional differences in the receptors  
392 expressed in different hippocampal regions. Nonetheless, based on the published  
393 literature, a clear pattern emerges in which challenge ligands (DG) predominantly  
394 impair LTP, whereas sufficiency ligands (CA) promote LTP (Figure 5 and Table S8).

395 **Neurogenesis.** The literature also records differential effects of DG and CA  
396 ligands. Group A (DG/challenge) ligands such as glucocorticoids, interleukins,  
397 interferons, and TNF- $\alpha$  are reported to inhibit neurogenesis (e.g., [44-50]) whereas  
398 group B (CA/sufficiency) ligands such as estrogen, progesterone, and FGF stimulate  
399 neurogenesis (e.g., [51-55]). There are some discordances, particularly when  
400 comparing long- and short-term effects (for example for glucocorticoids, reviewed in  
401 [47]). However, agents targeting DG predominantly suppress neurogenesis, whereas  
402 those targeting CA regions increase neurogenesis (Figure 5 and Table S8).

403 Because of the small number of samples, differences between each group  
404 (DG/CA)/parameter (LTP/neurogenesis) and a random distribution were not uniformly

405 significant (range  $P = 0.005$ – $0.114$  for four comparisons and two statistical tests). By  
406 contrast, intergroup comparisons revealed that the differences between groups A and  
407 B regarding LTP and neurogenesis were consistently highly significant (LTP,  $t$  test,  $P$   
408 =  $0.0001$ ; chi-square test,  $P = 0.0028$ ; neurogenesis,  $t$  test,  $P = 0.0002$ ; chi-square  
409 test,  $P = 0.006$ ) confirming that the patterns are indeed different.

410 In conclusion, ligand effects on both LTP and neurogenesis confirm that these  
411 hippocampal receptors are functional. Moreover, they indicate that the  
412 challenge/sufficiency axis extends to receptor function, wherein DG/challenge  
413 receptors predominantly inhibit both neurogenesis and synaptic plasticity, whereas  
414 CA/sufficiency ligands principally promote both parameters.

415

## 416 **DISCUSSION**

417 This work confirms and extends prior suggestions that the HPC is involved in internal  
418 sensing, as reflected here by greater expression of endocrine receptors than in any  
419 other brain region, including CX and CB.

420 With regard to our first question (how many receptors), we report that 86 of  
421 253 (34%) endocrine receptor genes are expressed in mouse HPC, and 17/98  
422 (17.3%) are exclusively expressed in HPC, values markedly higher than for any other  
423 brain region. This accords with our previous data, based on small sample size, that  
424 37% (21–59%, 95% CI) of mouse genes are expressed in HPC, a selection that  
425 predominantly encodes endocrine receptors and signaling molecules [21]. Aside from  
426 CX and CB, only low-level expression of these receptors was observed in other  
427 comparable brain regions (e.g., OLF, thalamus, pons/medulla, pallidum, or striatum;  
428 hypothalamus was not studied); these represent ca 4% of all receptors studied.

429 Thus, of all major brain regions in mouse, endocrine receptor genes are most  
430 prominently expressed in HPC, attesting that the present-day HPC is likely to play a  
431 sensory role in sensing internal (endocrine) markers of body physiology, arguing that  
432 the sensory function attributed to the primeval hippocampus [7-9] has been retained  
433 to this day.

434 Our analysis has focused largely on hormonal ligands, and has not addressed  
435 whether the HPC can directly sense levels of low molecular weight ligands (e.g.,  
436 minerals, pH, CO<sub>2</sub>, etc.) because much less is known about their receptors. For  
437 example, NHE4 (SLC9A4), that is activated by hypertonicity, is well expressed in  
438 HPC (Allen Brain Atlas), but its exact function is unknown. It could mediate direct

439 sensing of metabolites, although this remains speculative. It is possible that, with  
440 evolution, the mouse HPC now responds principally to peripheral hormones that act  
441 as proxies for metabolite levels. For example, aldosterone, a salt regulatory hormone,  
442 targets NR3C2 in the HPC.

443       Regarding our second question (patterning within the HPC), we report a highly  
444 significant non-random distribution of receptor expression across different HPC  
445 subregions of mouse HPC. Receptors whose biological function is known or may be  
446 inferred ('informative' genes,  $n = 32$ ) were expressed in a highly structured pattern  
447 within the formation. Ligands signaling different aspects of challenge (termed here  
448 group A: stress, infection, inflammation, blood pressure fall) were principally found to  
449 target receptors expressed in DG, whereas ligands signaling aspects of sufficiency  
450 (group B: androgens, endocrine FGF, estrogens, progestins, retinoic acid, thyroid  
451 hormones) instead principally target the CA regions, with a mean 8.33-fold difference  
452 in the DG versus CA expression ratio ( $P < 0.0001$ ).

453       Although the validity of this distinction remains open to debate (see Results for  
454 the underlying rationale), for the purposes of discussion we term this a  
455 'challenge/sufficiency' axis. The highly ordered (DG vs CA) segregation of receptor  
456 expression in mouse brain raises the question of the function of this segregation (see  
457 below).

458       We also report that the challenge/sufficiency axis accurately mirrors the effects  
459 of DG versus CA ligands. With few exceptions, DG/challenge receptors inhibit,  
460 whereas CA/sufficiency ligands promote, both neurogenesis and synaptic  
461 potentiation.

462       The contrasting effects on synaptic potentiation suggest that the hippocampus  
463 might act as an integrator of positive and negative information: given the  
464 paradigmatic hippocampal circuit: cortex  $\rightarrow$  DG  $\rightarrow$  CA3  $\rightarrow$  CA1  $\rightarrow$  cortex, the output  
465 of the hippocampus is likely to represent the summation of ligand effects on DG and  
466 CA regions. The recorded modulation of synaptic potentiation (and thus of overall  
467 neurotransmission through the HPC) by endocrine receptor ligands leads us to  
468 speculate that the ancestral function of LTP may have been to indicate relevant  
469 physiological states worthy of encoding in memory traces, ranging from no LTP  
470 (highly adverse context) to potent LTP (highly beneficial context).

471       A key question concerns whether the challenge/sufficiency axis is reiterated in  
472 primates. Preliminary inspection of the microarray-based Allan Human Brain Atlas

473 (<http://human.brain-map.org/>) fully confirms selective endocrine receptor expression  
474 in human HPC, consistent with internal sensing deficits in HPC-ablated patient H.M.  
475 [3], but the human data (from elderly individuals) are not strictly comparable to the  
476 analyzed data from young mice (and are therefore not presented). There are also  
477 hints that DG/CA patterning may be less well conserved in human (not presented),  
478 but we note that strict conservation of this patterning across vertebrates is unlikely  
479 because, for example, birds and reptiles lack a morphological dentate gyrus (e.g.,  
480 [56]). Indeed, there is no *a priori* reason why physical segregation of challenge  
481 versus sufficiency signaling should be necessary. We suspect that mouse brain may  
482 be a special (but informative) case – analysis of this species has pointed, for the first  
483 time, to differential HPC receptor localization according to function, providing a new  
484 and unexpected perspective on hippocampal function.

485         Although comprehensive *in situ* receptor expression data in human are so far  
486 lacking, there is firm evidence that a functional challenge/sufficiency axis also  
487 operates. The human HPC is at the heart of anxiety [57,58], as well as of stress  
488 responses and depression. Extensive review would be out of place, but we note that  
489 clinical administration of 'challenge' ligands (DG in mouse) such as IL-1 $\alpha$ , IL-2, IFN- $\alpha$ ,  
490 IFN- $\beta$ , and TNF- $\alpha$  produces malaise and sickness behavior [59-64], that has been  
491 suggested to be akin to anxiety/depression, whereas 'sufficiency' ligands (CA regions  
492 in mouse) such as androgens, IGF-1, and thyroid hormone have converse positive  
493 effects (e.g., [65-67]), all of which target HPC receptors, indicating that the axis is  
494 also functional in human. Systematic inventory of clinical data on  
495 challenge/sufficiency ligands will be necessary to confirm this contention.

496         Nonetheless, we observe an accurate correlation between ligands targeting  
497 CA regions and antidepressant/antidepressant benefits, and the converse for DG ligands.  
498 This parallels effects on neurogenesis, where CA ligands predominantly promote  
499 neurogenesis in the HPC whereas DG ligands inhibit neurogenesis. This is of special  
500 note given that stimulation of HPC neurogenesis has been directly linked to  
501 antidepressant action and has been used for new antidepressant drug screening  
502 (e.g., [68,69]); differential receptor localization may provide novel indicators for the  
503 development of new antidepressants/antidepressants.

504         In sum, the selective expression of endocrine receptors in mouse HPC, further  
505 highlighted by challenge–sufficiency patterning of endocrine receptor expression,  
506 argues that internal sensing remains a core function of the HPC. This accords with

507 evolutionary theory that the HPC arose from a chemosensory epithelium [7-9], and  
508 argues that the present-day HPC in particular has retained the ability to monitor the  
509 internal milieu of the body. Interoception mediated by the hippocampus may thus  
510 provide a new dimension to context-dependent memory encoding, extending from  
511 'where' and 'when' to 'how I feel'.

512 It will be vital to test these concepts in mice genetically engineered to express  
513 designer receptors only in DG versus CA regions, and to study the effect of ligand  
514 administration on physiology, behavior, and memory. It would also be very informative  
515 to study cross-species conservation of expression in larger mammals (rabbit, sheep,  
516 non-human primates) where the relative contribution of the hypothalamus (that was  
517 too small to be analyzed) could be examined in detail. Moreover, in addition to  
518 looking forwards (from mouse to primates), it would be highly illuminating (i) to  
519 examine in detail the trajectories of endocrine receptor expression during early  
520 development, and (ii) to address the expression profiles of homologs of these genes  
521 in other representatives of the vertebrate lineage including birds, reptiles, and fish.  
522 One promising line of investigation will be to dissect memory processes in the earliest  
523 organisms that encode associations between different internal and external stimuli.  
524 Addressing the earliest precedents, and the traces these have left in extant species,  
525 will be a fertile territory for new insights into the operation of the human brain.

526

### 527 **Supplementary data**

528 Table S1: List of 250 endocrine receptors studied in this work.

529 Table S2: Primary endocrine receptor gene expression data.

530 Table S3: Primary hippocampal endocrine receptor gene expression data.

531 Table S4: Pairwise correlation analysis.

532 Table S5: List of informative genes.

533 Table S6: Comparison of Allen Brain Atlas and HippoSeq expression data.

534 Table S7: Expression patterns of additional informative receptors confirms the  
535 challenge/sufficiency axis.

536 Table S8: Compilation of ligand effects on LTP and neurogenesis.

537 Box S1. Observations on the molecular functions of relevant endocrine receptors.

538

539

540



541 **Acknowledgments**

542 We thank the Allen Brain Institute (Seattle, WA, USA) and Janelia (Ashburn, VA,  
543 USA) for making their data publicly available, and to whom we express our deep  
544 appreciation. S.S. thanks the Carnegie Trust for the Universities of Scotland for a  
545 vacation scholarship. All data needed to evaluate the conclusions in the paper are  
546 presented in the paper and/or the supplementary materials online.

547

548 **Author Contributions**

549 **Conceptualization:** Richard Lathe, Gernot Riedel.

550 **Investigation:** Sheena Singadia, Richard Lathe, Gernot Riedel.

551 **Methodology:** Richard Lathe, Gernot Riedel, Sheena Singadia.

552 **Statistical analysis:** Crispin Jordan, Richard Lathe

553 **Project administration:** Gernot Riedel, Richard Lathe.

554 **Validation:** Richard Lathe; Sheena Singadia, Crispin Jordan, Gernot Riedel.

555 **Writing – original draft preparation:** Richard Lathe, Gernot Riedel.

556 **Writing – review & editing:** Richard Lathe; Sheena Singadia, Crispin Jordan,  
557 Gernot Riedel.

558

559 **Data Availability Statement:** All relevant data are within the manuscript and/or  
560 supplementary material online.

561

562 **Funding:** This research received no specific grant from any funding agency in the  
563 public, commercial or not-for-profit sectors.

564

565 **Competing interests:** The authors have declared that no competing interests exist.

566

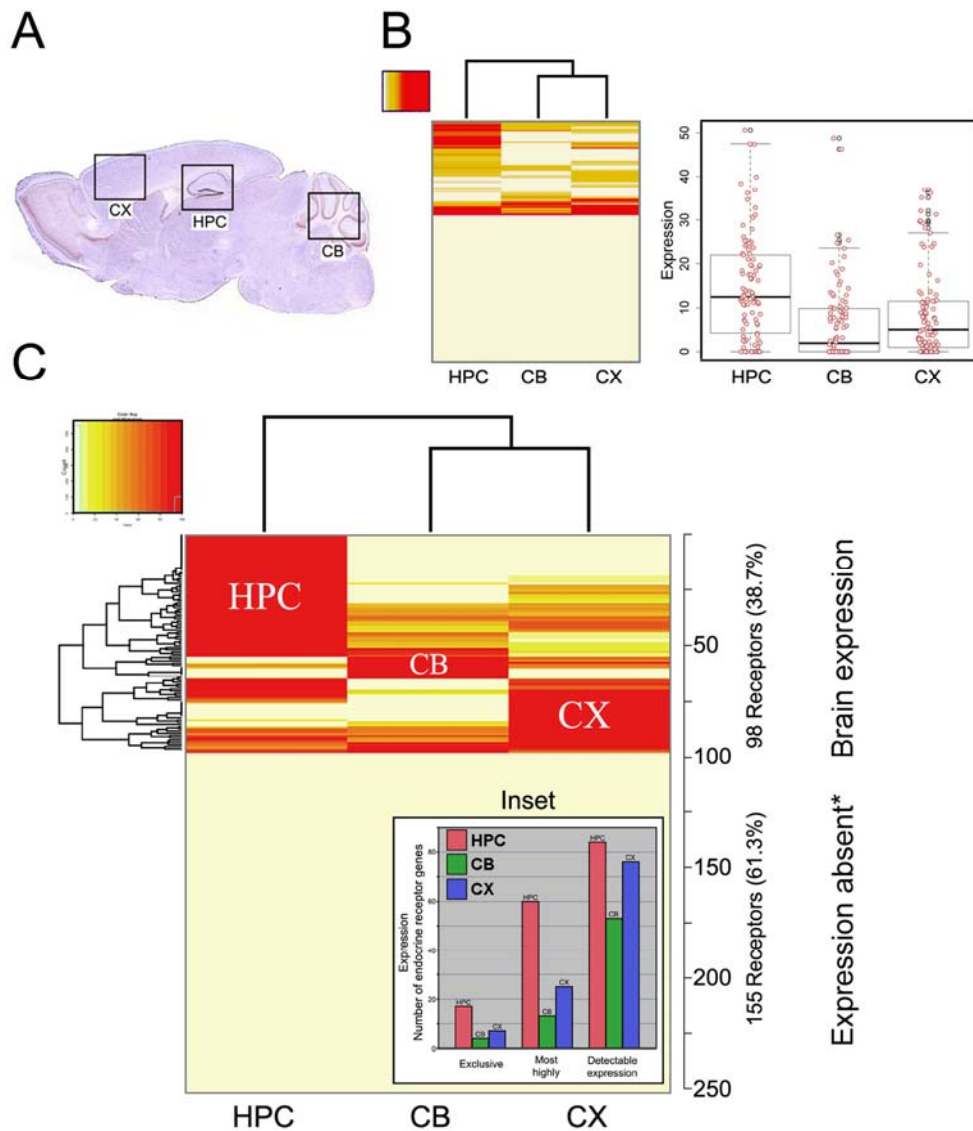

567

568

569

570

571

572

573

574

575

576

577

578

579

**Fig. 1. Endocrine receptor gene expression in mouse brain and enrichment in the hippocampus (HPC).**

More than one third of all endocrine receptors were detectably expressed in brain, where they are likely to modulate brain function and cognition. Expression was restricted to specific brain regions: other than hippocampus (HPC), cerebellum (CB), and cortex (CX), there was little evidence for specific gene expression in other comparable regions (~4%). (A) Mouse brain section highlighting the three regions studied in detail: HPC, CB, and CX. (B) (Left) Heatmap of 'raw' (unnormalized expression data, see Methods) for HPC versus CB and CX. (Right) Scatterplots of unnormalized expression levels; horizontal lines are medians and quartiles showing that the mean expression level of all receptors in HPC was significantly higher than in either CB or CX. (C) Normalized (maximum expression level = 100%) gene expression data. On three counts, the HPC (red), versus CB

580 (green) and CX (blue), is the major site of expression of endocrine receptors (253  
581 receptors examined) as further evidenced by the inset showing (i) exclusive  
582 expression in HPC, (ii) most prominent expression in HPC, (iii) overall number of  
583 receptors expressed. \*Receptors showing no detectable expression or low-  
584 level/punctate/irreproducible expression are classified as expression absent. Note  
585 that the dendrograms (generated by heatmap.2), depicted in A and B, are not  
586 supported by statistical analysis versus alternative, competing dendrograms. Genes  
587 that are expressed exclusively in HPC, CB, or CB were not distributed among these  
588 three regions with equal probability, and 'exclusive genes' were expressed most  
589 often in HPC; the same result emerges when considering genes that are expressed  
590 most prominently in one brain region. Thus, the HPC expresses both a greater  
591 number and level of endocrine receptor genes than any other brain region analyzed.  
592

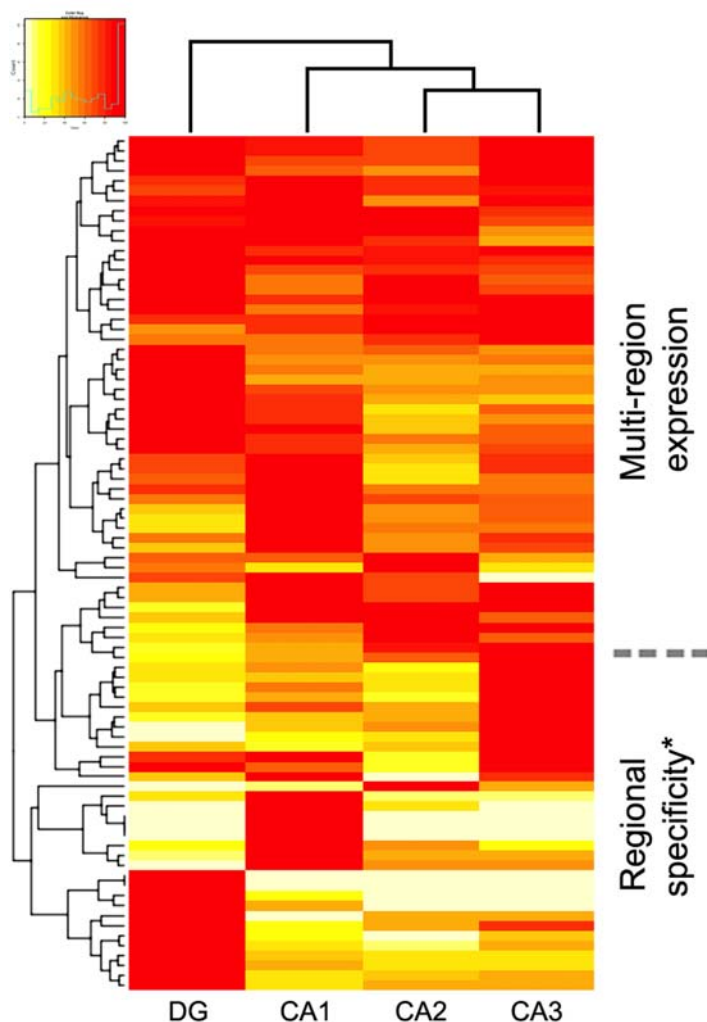

593

594 **Fig. 2. Subregional representation of 86 receptors expressed in mouse**  
595 **hippocampus (HPC).** Data are normalized to the maximum expression level. \*The  
596 data indicate that some receptors are somewhat restricted in their expression pattern  
597 to one subregion, whereas others are expressed in combinations of regions. Note:  
598 the depicted dendrograms (generated by heatmap.2) are not supported by statistical  
599 analysis versus alternative, competing dendrograms. There were significant positive  
600 correlations between CA2 and CA3, and significant negative correlations between  
601 CA1 and DG (Table S4).

602

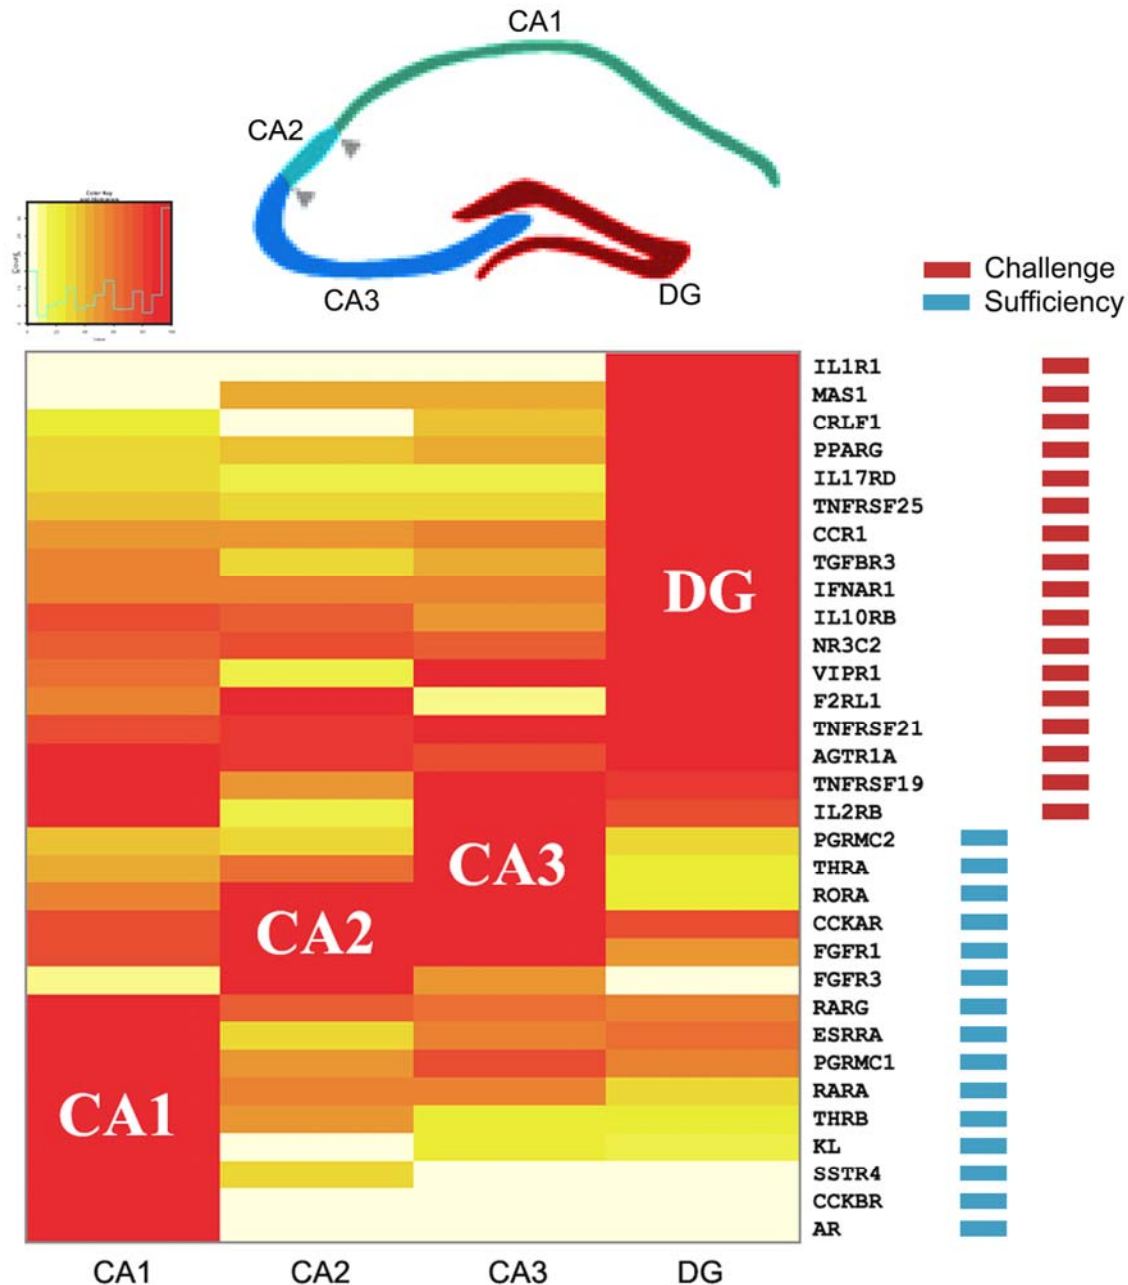

603

604 **Fig. 3. Expression of 'informative' endocrine receptors in subregions of the**  
 605 **mouse hippocampus (HPC).** (Above) Principal neuroanatomical subdivisions of the  
 606 rodent HPC (adapted from the model of [15]). (Below) Informative (see main text)  
 607 receptors sorted according to regional expression (heatmap, normalized data) with  
 608 CA1 and DG at the two extremes (Methods) showing expression clustering of  
 609 receptor types in different regions (e.g., 'sufficiency' – FGF receptors FGFR1, FGFR3,  
 610 and KL in CA regions; and 'challenge' – interleukin and TNF receptors IL1R1, IL17RD,  
 611 IL10RB, IL2RB, TNFRSRF 25, TNFRSF21, TNFRSF19 in DG).

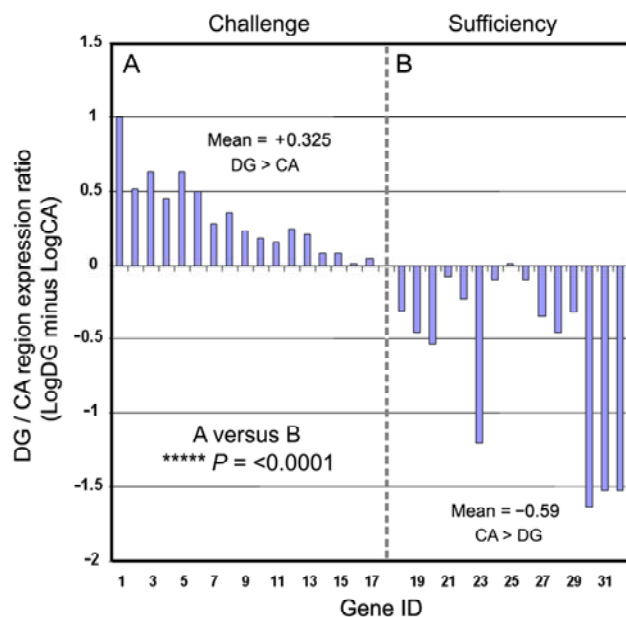

612

613 **Fig. 4. Ratios of CA versus DG expression for informative receptors. (A)** Group  
614 A (DG/challenge). **(B)** Group B (CA/sufficiency). Individual genes are ordered as in  
615 Fig. 3. The differential DG versus CA pattern of expression was highly significant.

616

617

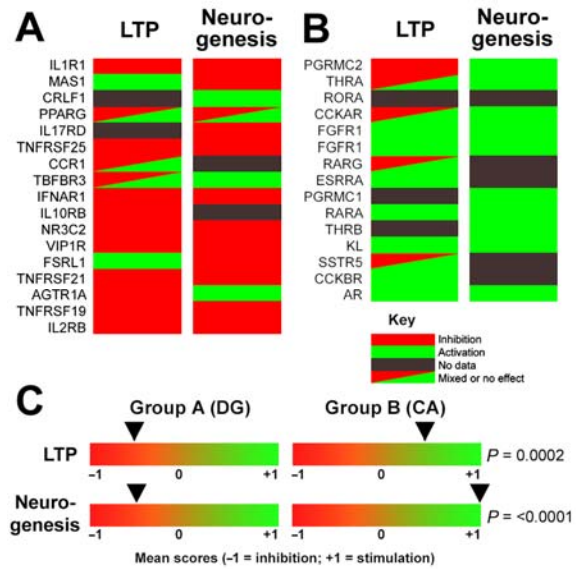

618

619

620

**Fig. 5. Differential effects of receptor activation on long-term potentiation (LTP)**

**and neurogenesis. (A)** Group A (DG/challenge). **(B)** Group B (CA/sufficiency).

Individual genes are ordered as in Figures 3 and 4. **(C)** Mean scores for the two

groups, demonstrating that group A receptors tend to suppress both LTP and

neurogenesis, whereas group B receptors tend to promote both parameters. The

differential patterns of stimulation/inhibition of LTP and neurogenesis were highly

significant between the two groups.

627

## References

628

629

- 630 1 Craig AD. How do you feel? Interoception: the sense of the physiological  
631 condition of the body. *Nat Rev Neurosci.* 2002;3, 655-666.
- 632 2 Scoville WB and Milner B. Loss of recent memory after bilateral  
633 hippocampal lesions. *J Neurol Neurosurg Psychiatr.* 1957;20, 11-21.
- 634 3 Hebben N, Corkin S, Eichenbaum H, Shedlack K. Diminished ability to  
635 interpret and report internal states after bilateral medial temporal  
636 resection: case H.M. *Behav Neurosci.* 1985;99, 1031-1039.
- 637 4 Davidson TL and Jarrard LE. A role for hippocampus in the utilization of  
638 hunger signals. *Behav Neural Biol.* 1993;59, 167-171.
- 639 5 Clifton PG, Vickers SP, Somerville EM. Little and often: ingestive  
640 behaviour patterns following hippocampal lesions in rats. *Behav Neurosci.*  
641 1998;112, 502-511.
- 642 6 Davidson TL, Kanoski SE, Chan K, Clegg DJ, Benoit SC, Jarrard LE.  
643 Hippocampal lesions impair retention of discriminative responding based  
644 on energy state cues. *Behav Neurosci.* 2010;124, 97-105.
- 645 7 Riss W, Halpern M, Scalia F. Anatomical aspects of the evolution of the  
646 limbic and olfactory systems and their potential significance for behaviour.  
647 *Ann NY Acad Sci.* 1969;159, 1096-1111.
- 648 8 Nieuwenhuys R, Ten Donkelaar HJ, Nicholson C. The central nervous  
649 system of vertebrates. Berlin: Springer; 1997.
- 650 9 Lathe R. Hormones and the hippocampus. *J Endocrinol.* 2001;169, 205-  
651 231.
- 652 10 Altman J. Autoradiographic and histological studies of postnatal  
653 neurogenesis. IV. Cell proliferation and migration in the anterior forebrain,  
654 with special reference to persisting neurogenesis in the olfactory bulb. *J*  
655 *Comp Neurol.* 1969;137, 433-457.
- 656 11 Lledo PM and Valley M. Adult olfactory bulb neurogenesis. *Cold Spring*  
657 *Harb Perspect Biol.* 2016;8.
- 658 12 Wilken MS and Reh TA. Retinal regeneration in birds and mice. *Curr Opin*  
659 *Genet Dev.* 2016;40, 57-64.
- 660 13 Ming GL and Song H. Adult neurogenesis in the mammalian brain:  
661 significant answers and significant questions. *Neuron.* 2011;70, 687-702.
- 662 14 Duvernoy H, Cattin F, Risold P-Y. The Human Hippocampus: Functional  
663 Anatomy, Vascularization and Serial Sections with MRI. Heidelberg:  
664 Springer; 2013.
- 665 15 Lein ES, Zhao X, Gage FH. Defining a molecular atlas of the  
666 hippocampus using DNA microarrays and high-throughput in situ  
667 hybridization. *J Neurosci.* 2004;24, 3879-3889.
- 668 16 Bienkowski MS, Bowman I, Song MY, Gou L, Ard T, Cotter K et al.  
669 Integration of gene expression and brain-wide connectivity reveals the  
670 multiscale organization of mouse hippocampal networks. *Nat Neurosci.*  
671 2018;21, 1628-1643.
- 672 17 Thompson CL, Pathak SD, Jeromin A, Ng LL, MacPherson CR, Mortrud  
673 MT et al. Genomic anatomy of the hippocampus. *Neuron.* 2008;60, 1010-  
674 1021.
- 675 18 Thompson CL, Ng L, Menon V, Martinez S, Lee CK, Glattfelder K et al. A  
676 high-resolution spatiotemporal atlas of gene expression of the developing  
677 mouse brain. *Neuron.* 2014;83, 309-323.



- 678 19 Stapleton G, Steel M, Richardson M, Mason JO, Rose KA, Morris RG et al.  
679 A novel cytochrome P450 expressed primarily in brain. *J Biol Chem.*  
680 1995;270, 29739-29745.
- 681 20 Davies BJ, Pickard BS, Steel M, Morris RG, Lathe R. Serine proteases in  
682 rodent hippocampus. *J Biol Chem.* 1998;273, 23004-22011.
- 683 21 Steel M, Moss J, Clark KA, Kearns IR, Davies CH, Morris RG et al. Gene-  
684 trapping to identify and analyze genes expressed in the mouse  
685 hippocampus. *Hippocampus.* 1998;8, 444-457.
- 686 22 Lein ES, Hawrylycz MJ, Ao N, Ayres M, Bensinger A, Bernard A et al.  
687 Genome-wide atlas of gene expression in the adult mouse brain. *Nature.*  
688 2007;445, 168-176.
- 689 23 Rueden CT, Schindelin J, Hiner MC, DeZonia BE, Walter AE, Arena ET et  
690 al. ImageJ2: ImageJ for the next generation of scientific image data. *BMC*  
691 *Bioinformatics.* 2017;18, 529.
- 692 24 Schneider CA, Rasband WS, Eliceiri KW. NIH Image to ImageJ: 25 years  
693 of image analysis. *Nat Methods.* 2012;9, 671-675.
- 694 25 R Core Team. R: A Language and Environment for Statistical Computing.  
695 Vienna: R Foundation for Statistical Computing; 2019.
- 696 26 Canty A and Ripley B. Boot: bootstrap R (S-Plus) functions. R package  
697 version 1.3-20. 2017.
- 698 27 Davison AC and Hinkley DV. *Bootstrap Methods and Their Applications.*  
699 Cambridge: Cambridge University Press; 1997.
- 700 28 Cembrowski MS, Wang L, Sugino K, Shields BC, Spruston N. HippoSeq: a  
701 comprehensive RNA-seq database of gene expression in hippocampal  
702 principal neurons. *Elife.* 2016;5, e14997.
- 703 29 Tancredi V, Zona C, Velotti F, Eusebi F, Santoni A. Interleukin-2  
704 suppresses established long-term potentiation and inhibits its induction in  
705 the rat hippocampus. *Brain Res.* 1990;525, 149-151.
- 706 30 Katsuki H, Nakai S, Hirai Y, Akaji K, Kiso Y, Satoh M. Interleukin-1 beta  
707 inhibits long-term potentiation in the CA3 region of mouse hippocampal  
708 slices. *Eur J Pharmacol.* 1990;181, 323-326.
- 709 31 Tancredi V, D'Arcangelo G, Grassi F, Tarroni P, Palmieri G, Santoni A et al.  
710 Tumor necrosis factor alters synaptic transmission in rat hippocampal  
711 slices. *Neurosci Lett.* 1992;146, 176-178.
- 712 32 Bellinger FP, Madamba S, Siggins GR. Interleukin 1 beta inhibits synaptic  
713 strength and long-term potentiation in the rat CA1 hippocampus. *Brain*  
714 *Res.* 1993;628, 227-234.
- 715 33 Coogan A and O'Connor JJ. Inhibition of NMDA receptor-mediated  
716 synaptic transmission in the rat dentate gyrus in vitro by IL-1 beta.  
717 *Neuroreport.* 1997;8, 2107-2110.
- 718 34 Ikegaya Y, Saito H, Torii K, Nishiyama N. Activin selectively abolishes  
719 hippocampal long-term potentiation induced by weak tetanic stimulation in  
720 vivo. *Jpn J Pharmacol.* 1997;75, 87-89.
- 721 35 Mendoza-Fernandez V, Andrew RD, Barajas-Lopez C. Interferon-alpha  
722 inhibits long-term potentiation and unmasks a long-term depression in the  
723 rat hippocampus. *Brain Res.* 2000;885, 14-24.
- 724 36 Griffin R, Nally R, Nolan Y, McCartney Y, Linden J, Lynch MA. The age-  
725 related attenuation in long-term potentiation is associated with microglial  
726 activation. *J Neurochem.* 2006;99, 1263-1272.

- 727 37 Ishiyama J, Saito H, Abe K. Epidermal growth factor and basic fibroblast  
728 growth factor promote the generation of long-term potentiation in the  
729 dentate gyrus of anaesthetized rats. *Neurosci Res.* 1991;12, 403-411.
- 730 38 Matsuoka N, Kaneko S, Satoh M. Somatostatin augments long-term  
731 potentiation of the mossy fiber-CA3 system in guinea-pig hippocampal  
732 slices. *Brain Res.* 1991;553, 188-194.
- 733 39 Hisajima H, Saito H, Abe K, Nishiyama N. Effects of acidic fibroblast  
734 growth factor on hippocampal long-term potentiation in fasted rats. *J*  
735 *Neurosci Res.* 1992;31, 549-553.
- 736 40 Yasui M and Kawasaki K. CCKB-receptor activation augments the long-  
737 term potentiation in guinea pig hippocampal slices. *Jpn J Pharmacol.*  
738 1995;68, 441-447.
- 739 41 Vara H, Munoz-Cuevas J, Colino A. Age-dependent alterations of long-  
740 term synaptic plasticity in thyroid-deficient rats. *Hippocampus.* 2003;13,  
741 816-825.
- 742 42 Dong J, Yin H, Liu W, Wang P, Jiang Y, Chen J. Congenital iodine  
743 deficiency and hypothyroidism impair LTP and decrease C-fos and C-jun  
744 expression in rat hippocampus. *Neurotoxicology.* 2005;26, 417-426.
- 745 43 Taskin E, Artis AS, Bitiktas S, Dolu N, Liman N, Suer C. Experimentally  
746 induced hyperthyroidism disrupts hippocampal long-term potentiation in  
747 adult rats. *Neuroendocrinology.* 2011;94, 218-227.
- 748 44 Iosif RE, Ekdahl CT, Ahlenius H, Pronk CJ, Bonde S, Kokaia Z et al.  
749 Tumor necrosis factor receptor 1 is a negative regulator of progenitor  
750 proliferation in adult hippocampal neurogenesis. *J Neurosci.* 2006;26,  
751 9703-9712.
- 752 45 Erta M, Quintana A, Hidalgo J. Interleukin-6, a major cytokine in the  
753 central nervous system. *Int J Biol Sci.* 2012;8, 1254-1266.
- 754 46 Vallieres L, Campbell IL, Gage FH, Sawchenko PE. Reduced  
755 hippocampal neurogenesis in adult transgenic mice with chronic astrocytic  
756 production of interleukin-6. *J Neurosci.* 2002;22, 486-492.
- 757 47 Saaltink DJ and Vreugdenhil E. Stress, glucocorticoid receptors, and adult  
758 neurogenesis: a balance between excitation and inhibition? *Cell Mol Life*  
759 *Sci.* 2014;71, 2499-2515.
- 760 48 Odaka H, Adachi N, Numakawa T. Impact of glucocorticoid on  
761 neurogenesis. *Neural Regen Res.* 2017;12, 1028-1035.
- 762 49 Borsini A, Alboni S, Horowitz MA, Tojo LM, Cannazza G, Su KP et al.  
763 Rescue of IL-1beta-induced reduction of human neurogenesis by omega-  
764 3 fatty acids and antidepressants. *Brain Behav Immun.* 2017;65, 230-238.
- 765 50 Borsini A, Cattaneo A, Malpighi C, Thuret S, Harrison NA, Zunszain PA et  
766 al. Interferon-alpha reduces human hippocampal neurogenesis and  
767 increases apoptosis via activation of distinct STAT1-dependent  
768 mechanisms. *Int J Neuropsychopharmacol.* 2018;21, 187-200.
- 769 51 Yoshimura S, Takagi Y, Harada J, Teramoto T, Thomas SS, Waeber C et  
770 al. FGF-2 regulation of neurogenesis in adult hippocampus after brain  
771 injury. *Proc Natl Acad Sci U S A.* 2001;98, 5874-5879.
- 772 52 Fowler CD, Liu Y, Wang Z. Estrogen and adult neurogenesis in the  
773 amygdala and hypothalamus. *Brain Res Rev.* 2008;57, 342-351.
- 774 53 Suzuki S, Gerhold LM, Bottner M, Rau SW, Dela CC, Yang E et al.  
775 Estradiol enhances neurogenesis following ischemic stroke through  
776 estrogen receptors alpha and beta. *J Comp Neurol.* 2007;500, 1064-1075.

- 777 54 Chan M, Chow C, Hamson DK, Lieblich SE, Galea LA. Effects of chronic  
778 oestradiol, progesterone and medroxyprogesterone acetate on  
779 hippocampal neurogenesis and adrenal mass in adult female rats. *J*  
780 *Neuroendocrinol.* 2014;26, 386-399.
- 781 55 Kang W and Hebert JM. FGF signaling is necessary for neurogenesis in  
782 young mice and sufficient to reverse its decline in old mice. *J Neurosci.*  
783 2015;35, 10217-10223.
- 784 56 Bingman VP and Muzio RN. Reflections on the structural-functional  
785 evolution of the hippocampus: what is the big deal about a dentate gyrus?  
786 *Brain Behav Evol.* 2017;90, 53-61.
- 787 57 Gray JA. *The Neuropsychology of Anxiety: An Enquiry into the Functions*  
788 *of the Septo-Hippocampal System.* Oxford: Oxford University Press; 1982.
- 789 58 Gray JA and McNaughton N. *The Neuropsychology of Anxiety: An Enquiry*  
790 *into the Functions of the Septo-Hippocampal System.* Oxford: Oxford  
791 University Press; 2000.
- 792 59 Smith JW, Urba WJ, Curti BD, Elwood LJ, Steis RG, Janik JE et al. The  
793 toxic and hematologic effects of interleukin-1 alpha administered in a  
794 phase I trial to patients with advanced malignancies. *J Clin Oncol.*  
795 1992;10, 1141-1152.
- 796 60 Capuron L, Ravaud A, Gualde N, Bosmans E, Dantzer R, Maes M et al.  
797 Association between immune activation and early depressive symptoms  
798 in cancer patients treated with interleukin-2-based therapy.  
799 *Psychoneuroendocrinology.* 2001;26, 797-808.
- 800 61 Valentine AD, Meyers CA, Kling MA, Richelson E, Hauser P. Mood and  
801 cognitive side effects of interferon-alpha therapy. *Semin Oncol.* 1998;25,  
802 39-47.
- 803 62 Raison CL, Demetrashvili M, Capuron L, Miller AH. Neuropsychiatric  
804 adverse effects of interferon-alpha: recognition and management. *CNS*  
805 *Drugs.* 2005;19, 105-123.
- 806 63 Exton MS, Baase J, Pithan V, Goebel MU, Limmroth V, Schedlowski M.  
807 Neuropsychological performance and mood states following acute  
808 interferon-beta-1b administration in healthy males. *Neuropsychobiology.*  
809 2002;45, 199-204.
- 810 64 Creaven PJ, Plager JE, Dupere S, Huben RP, Takita H, Mittelman A et al.  
811 Phase I clinical trial of recombinant human tumor necrosis factor. *Cancer*  
812 *Chemother Pharmacol.* 1987;20, 137-144.
- 813 65 Zarrouf FA, Artz S, Griffith J, Sirbu C, Kommor M. Testosterone and  
814 depression: systematic review and meta-analysis. *J Psychiatr Pract.*  
815 2009;15, 289-305.
- 816 66 Gruber AJ and Pope HG, Jr. Psychiatric and medical effects of anabolic-  
817 androgenic steroid use in women. *Psychother Psychosom.* 2000;69, 19-  
818 26.
- 819 67 Bauer M, Hellweg R, Graf KJ, Baumgartner A. Treatment of refractory  
820 depression with high-dose thyroxine. *Neuropsychopharmacology.* 1998;18,  
821 444-455.
- 822 68 Hanson ND, Owens MJ, Nemeroff CB. Depression, antidepressants, and  
823 neurogenesis: a critical reappraisal. *Neuropsychopharmacology.* 2011;36,  
824 2589-2602.

825 69 Yan HC, Cao X, Gao TM, Zhu XH. Promoting adult hippocampal  
826 neurogenesis: a novel strategy for antidepressant drug screening. *Curr*  
827 *Med Chem.* 2011;18, 4359-4367.  
828  
829
